# Supplementary material for: Chlorine vs. Sodium Chloride Regeneration of Zeolite Column for Ammonium Removal from an Explosives Impacted Mining Wastewater
Source: MDPI journal article supplement (doi:10.3390/w14193094), 2022-10-01
Supplement: s1 [file s1]

Archive with 1 entries (1 files):
- water-1920650-supplementary.pdf
