# Supplementary material for: Chlorine vs. Sodium Chloride Regeneration of Zeolite Column for Ammonium Removal from an Explosives Impacted Mining Wastewater
Source: MDPI journal article supplement (doi:10.3390/w14193094), 2022-10-01
Supplement: s1 [file s1 › water-1920650-supplementary.pdf]

Article

# Chlorine vs. Sodium Chloride Regeneration of Zeolite Column for Ammonium Removal from an Explosives Impacted Mining Wastewater

Tianguang Zhang <sup>1</sup>, Roberto M. Narbaitz <sup>1,\*</sup>, Majid Sartaj <sup>1</sup> and Jason Downey <sup>2</sup>

<sup>1</sup> Department of Civil Engineering, University of Ottawa, 161 Louis Pasteur Pvt., Ottawa, ON K1N-6N5, Canada

<sup>2</sup> Dowclear Inc., 627 South Island Park Drive, Manotick, ON K4M-1J2, Canada

\* Correspondence: narbaitz@uottawa.ca

## Supplementary Materials:

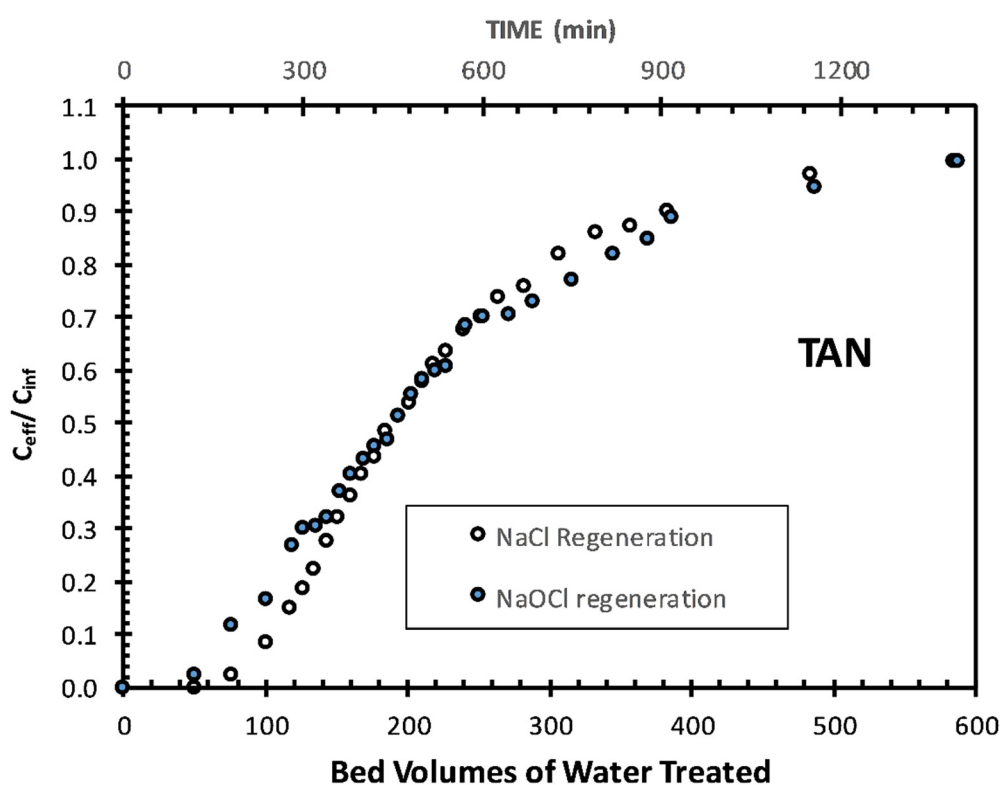

**Figure S1.** TAN breakthrough for the first 23 h loading cycles of the NaCl and NaOCl regeneration runs (SL1 and CL1).
